23 gastrocnemius elastic system in the guinea fowl displays little to no plastic response to decreased  
24 demand during growth and hypothesize that neural plasticity may explain performance variation.

## 25 **Introduction**

26 Taking advantage of storage and release of elastic strain energy can enhance performance that would  
27 otherwise be limited by the force-velocity constraints of muscle. The temporal decoupling of energy  
28 production from energy delivery permitted by elastic energy storage allows muscles and tendons to  
29 produce force effectively over a range of shortening or lengthening speeds. Muscles may generate  
30 forces during slow or isometric contractions and elastic recoil augments the rate of energy delivery  
31 or absorption during rapid movements [1,2]. By making use of energy storage in the tendon  
32 “spring”, a muscle tendon unit (MTU) can produce force more economically or with greater power  
33 than a muscle alone [2]. Yet, several studies have identified important differences among spring-  
34 muscle combinations. Wilson, Lichwark, and colleagues [3,4] showed that the efficiency of an MTU  
35 during cyclic loading depends on the tuning of relative muscle and spring properties. For instance,  
36 muscle efficiency varies with both fascicle length and tendon stiffness, with the specific optimal  
37 efficiency values depending on gait conditions [3]. Several researchers [5–9] have shown that the  
38 opposing inertial or drag forces acting on a motor-spring system also influence whether springs  
39 enhance performance. Adding further complexity, Sawicki and colleagues [10,11] found that the  
40 timing of neural activation of muscle during hopping must be tightly controlled to take advantage of  
41 in-series springs. Together, this body of work suggests that understanding the conditions in which  
42 spring systems enhance performance may require expanding our focus from the muscle-tendon unit  
43 to that of the broader ‘elastic system’ which includes the muscle (motor), the spring, the resistive  
44 forces, and the neural control of the system. The optimal performance of an elastic system may

45 require tuning of both morphology and neural control. This approach recognizes the integrated  
46 nature of the neuro-musculoskeletal system[12].

47 The sensitivity of elastic system efficiency to the tuning of its components complicates inferences  
48 for how elastic systems systematically adapt to functional demand during maturation. For instance,  
49 do growing individuals who regularly perform functions that utilize elastic strain energy develop  
50 elastic systems with greater energy storage capacity? This is still unknown because most studies of  
51 MTU plasticity have focused on how individual components of elastic systems (neural control [13–  
52 15], muscle [16–19] and tendon [20–25]) vary with task or training, and how those individual  
53 changes influence function of a muscle-tendon unit [10,11,26–28]. Yet, the integrated nature of the  
54 elastic system suggests that functional consequences of plasticity are difficult to predict by analyzing  
55 elements in isolation [27,29,30]. Therefore, the complex nature of the neuromuscular adaptation of  
56 elastic systems may require analysis at the system level rather than at the level of individual  
57 components.

58 Here we present a study of the morphological plasticity of an elastic system. Specifically, we ask  
59 whether individuals that jump during maturation (an activity requiring elastic energy storage and  
60 return [31]) develop elastic systems that more capable of storing elastic strain energy at maturity than  
61 those of individuals restricted from jumping. Here we focus on the elastic system most involved in  
62 storage and release of elastic energy during jumping[32–36], the gastrocnemius elastic system. We  
63 test this by altering the rearing conditions of two groups of guinea fowl (*Numida meleagris*) across the  
64 entire growth period, allowing one group to engage in jump-to-perch behavior and preventing all  
65 jumping in the other group. We previously reported that restricted birds in this study showed  
66 detriments in jump performance at adulthood [37]. In this manuscript, we aim to link the  
67 morphological and functional consequences of our intervention.

68 Of the morphology data, we take both an individual-component and systems-level approach to  
69 evaluate the plasticity of an elastic system during growth. At the component level, we probe  
70 whether our treatment resulted in systematic morphological differences in individual components of  
71 the gastrocnemius elastic system between groups. We seek to determine whether components of this  
72 elastic system plastically adapt to variations in functional demand during growth. At the systems  
73 level, we ask how plastic changes at the component level interact to influence the capacity for elastic  
74 energy storage. To do this, we developed subject-specific musculoskeletal models that incorporated  
75 experimentally measured morphological properties of each bird's elastic system. With each subject-  
76 specific model, we simulated a fully activated muscle contraction under various postures and  
77 quantified the resulting tendon energy stored. The purpose of this systems-level analysis was to  
78 evaluate the integrated effects of morphological variation.

79 The component-and systems-level analyses serve as a case study for understanding how a particular  
80 elastic system changes with functional demand. We also took advantage of the variation within and  
81 across groups to ask broader questions about the relationship between form and function in elastic  
82 systems. Specifically, we asked which combinations of naturally occurring morphological variation  
83 most influence the ability of an elastic system to store energy. Lastly, we probed the extent to which  
84 energy storage capacity in the gastrocnemius elastic system correlated with jump performance.

85 We hypothesize that components of an elastic system plastically adapt to variations in functional  
86 demand during maturation, resulting in greater energy storage capacity in birds that jump during  
87 growth. We predict energy storage capacity will increase linearly with muscle force-generating  
88 capacity and inversely with tendon stiffness [38–40]. Finally, we predict that differences in jump  
89 performance positively correlate with an animal's ability to store elastic strain energy in the tendon  
90 of the gastrocnemius elastic system.

## 91 **Methods**

### 92 **Experimental Protocol**

93 *Animals.* To study these questions, one-day-old guinea fowl keets (*Numida meleagris*) were obtained  
94 from a regional breeder (Guinea Farm; New Vienna, IA). After a 2-wk brooding period, the keets  
95 were pen reared through skeletal maturity (>6 months) in one of two conditions, as we previously  
96 described in detail (Cox et al 2020). A control group (C; n =8) was housed in a large, circular pen  
97 (3.14 m<sup>2</sup>) that allowed ample room for locomotion and objects for jumping and perching. The  
98 restricted treatment group (R; n = 7) were raised a smaller pen (1 m<sup>2</sup> at maturity) with low mesh  
99 ceilings that prevented jumping. Food and water were available *ad libitum* (food intake did not differ  
100 between groups). Lights were programmed to be on a 12:12-h light-dark cycle. The experimental  
101 protocol was approved by Institutional Animal Care and Use Committee at The Pennsylvania State  
102 University (IACUC; Ref. #46435).

103 *Movement Analysis.* As described previously [37], to quantify the influence of pen configuration on the  
104 movement patterns of both treatment groups, pens were filmed from above for ten minutes, four  
105 times per day, across the growth period (Foscam; C2 1080p HD cameras, Houston, TX). For each  
106 bird in the pen, behaviors were tracked and categorized into two states (standing or walking) and  
107 three events [short sprint (<2 sec), hurdle jump (< body height) and perch jump (~2 x body height).

### 108 **Functional Measures**

109 As described previously [37], jump performance was measured by placing each bird in turn on 6x6  
110 in. force plates (AMTI HE6x6; Watertown, MA, USA) enclosed in a tapered box and encouraging  
111 the birds to jump. Jump power was calculated from the instantaneous net vertical ground reaction  
112 and the vertical center of mass velocity. Velocity was obtained by integrating the center of mass

113 acceleration, which was in turn found from the net ground reaction force and the body mass. We  
114 calculated jump work by integrating the instantaneous power with respect to time over the course of  
115 the jump.

## 116 **Quantification of properties of individual components of the elastic system**

117 *Specimen muscle architecture preparation.* The pelvic limb was separated from the upper body and the left  
118 and right legs were then split by sectioning the pelvis at the midline while avoiding muscle  
119 attachments. Right limbs were placed into neutral buffered formalin for fixation (10%) for at least  
120 two weeks, while left legs were fresh-frozen and kept at -20 °C. Right limbs were positioned with  
121 joint angles approximating those at mid-swing during running (hip: 30°, knee: 80°, ankle: 125°,  
122 within  $\pm 2^\circ$  [41]). Joint angles were confirmed for the fixed limbs using photographs made with a  
123 digital camera (Canon EOS550D; Surrey, United Kingdom) and analyzed with ImageJ (National  
124 Institutes of Health, Bethesda, MD). Left limbs were fresh-frozen and saved for later muscle mass  
125 measures.

126 *Muscle Analyses.* We made measurements of the lateral and medial heads of the gastrocnemius muscle  
127 (LG and MG), the muscle group of the MTU thought primarily responsible for storage and release  
128 of elastic strain energy during running and jumping [31,36]. The third (intermedia) head of the  
129 gastrocnemius only comprises ~10% of the total mass of the gastrocnemius muscles in this species  
130 [42] and thus was not included in the analysis. MG and LG were dissected from the fresh-frozen  
131 left limbs and weighed to the nearest 0.1 milligram. The LG and MG were then dissected from the  
132 fixed limbs for fascicle length, pennation angle, and sarcomere analysis. LG was first split  
133 longitudinally through the mid-belly to view fascicle arrangement. Photographs of whole MG and  
134 split LG made with a digital camera (Canon EOS550D) were imported into ImageJ for

135 measurement of the pennation angle between muscle fascicles and their insertions on the  
136 aponeurosis [43].

137 Due to the expected within-muscle heterogeneity of strain [44,45], each muscle was divided into  
138 sections for analysis. MG was split into anterior and posterior fascicles [46] and then again split  
139 proximally/distally, resulting in four sections. The LG was split into proximal, middle, and distal  
140 sections, each spanning one-third the length of the muscle belly. Average pennation angle was found  
141 for each section by taking the mean of three angle measurements. Sarcomere lengths for each  
142 section were found using the laser diffraction techniques described in [43]. A minimum of three  
143 sarcomere length measurements were taken from each muscle fascicle bundle and these  
144 measurements were averaged to obtain the mean measured sarcomere length.

145 Optimal fascicle length,  $L_o$ , was calculated by multiplying the length of the fascicle by the ratio of  
146 optimal sarcomere length of guinea fowl muscle ( $2.36 \mu\text{m}$ ; [46]) to the mean measured sarcomere  
147 length.

148 Pennation angle at optimal fascicle length,  $\theta_{OFL}$ , was calculated from the average measured  
149 pennation angle,  $\bar{\theta}$ , and the ratio of measure fiber length,  $F_f$ , and calculated optimal fascicle length,  
150  $L_o$  according to the equation [47]:

$$\theta_{OFL} = \sin^{-1} \left\{ \frac{F_f \sin \bar{\theta}}{L_o} \right\} \quad (1)$$

151 Maximum isometric force along the muscle fiber for the MG and LG were calculated from the  
152 muscle mass,  $m$ , optimal fascicle length,  $L_o$  and muscle density ( $\rho_{\text{musc}} = 1060 \text{ kg/m}^3$  [48]) using the  
153 specific tension,  $f$  ( $3 \times 10^5 \text{ N/m}^2$ , Rospars and Meyer-Vernet, 2016), according to the equation:

$$F_{max} = \frac{f * m}{\rho_{musc} L_0} \quad (2)$$

154 We specifically calculated isometric force along the muscle fiber for input into the musculoskeletal  
155 model rather than including the influence of pennation angle because pennation angle is a separate  
156 input into the OpenSim Millard muscle model (see below for model description), which accounts  
157 for the change in pennation angle with muscle  
158 length [50]. For statistical tests, muscle force along  
159 the tendon was analyzed.

160 *Moment Arm.* Gastrocnemius moment arm at the  
161 ankle was experimentally measured using the  
162 tendon travel method [51,52] as described by  
163 Salzano (2020). The gastrocnemius moment arm  
164 at the ankle was experimentally measured using  
165 the tendon travel method as described by Salzano  
166 [53]. In short, the Achilles tendon was attached to  
167 a linear transducer (Model P510-2-S11-N0S-10C,  
168 UniMeasure, Inc., Corvallis, OR) to measure  
169 excursion and kept at a constant 10N tension to  
170 prevent changes in tendon strain (Figure 1).

171 Retroreflective markers were placed on dissected  
172 limbs to track the relative movement of the tibia  
173 and tarsometatarsus in 3D across a range of joint  
174 angles using a 4-camera Motion Analysis system

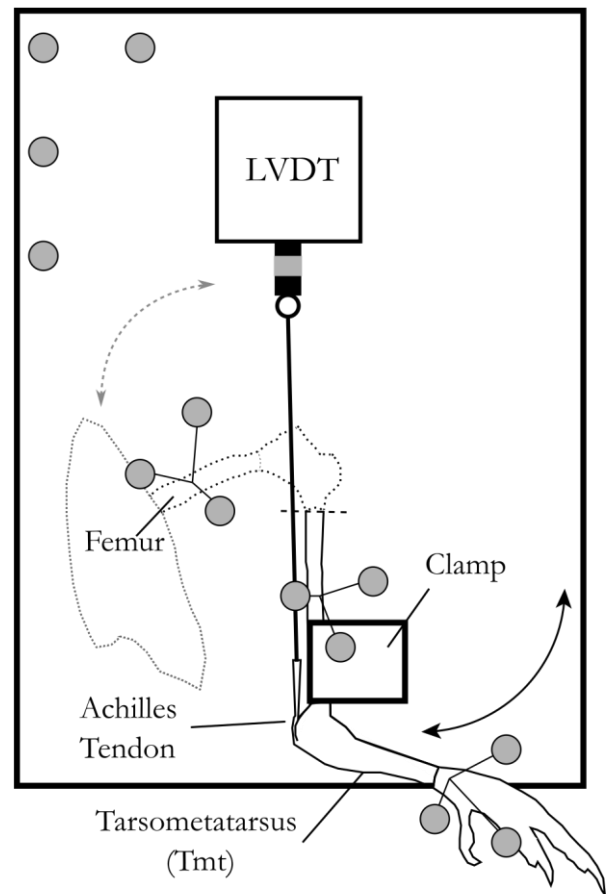

Figure 1: Setup for the tendon travel experiment. The limb was positioned so that the tibiotarsus was held firm by a 3D printed clamp. In the knee joint motion trial, the femur was rotated to move the knee through its ROM. The tibiotarsus was then cut to remove the proximal portion of the limb, allowing for LVDT to be attached to the Achilles tendon. For tendon travel trials, the TMT was rotated to move the ankle through its ROM. Gray coloring represents retroreflective markers on the limb and LVDT. The dotted line outlines the pelvis femur, and knee, which were removed after the knee joint motion trial. The dashed line represents location at which the tibiotarsus was cut after the knee joint motion trial. Figure adapted from Salzano, 2020.



175 (300 Hz; Kestrel, Motion Analysis Corporation, Santa Rosa, CA), and automatically synchronized to  
176 the linear transducer data within the motion analysis software (Cortex , Motion Analysis  
177 Corporation). Joint centres and a mean helical axis were calculated from motion data for each trial  
178 and used to calculate flexion angle at the ankle at each timepoint [54]. A cubic spline was fit to the  
179 tendon excursion versus flexion angle points using least-squares approximation and tendon  
180 excursion was differentiated with respect to angle to estimate moment arm across the measured  
181 range of motion (30°-90°). Average values are reported in Table 1.

182 *Tendon force-length curves.* We quantified the tendon force-length properties with material analysis as  
183 described in [25]. In short, tendons were detached from the gastrocnemius muscles but left attached  
184 at their insertion points on the tarsometatarsus bone. Both the bone and the tendon's proximal end  
185 were connected to a material testing machine (858 Mini Bionix II; MTS Systems Corp; Eden Prairie,  
186 MN, United States). Samples were mounted vertically using custom clamps on the tendon  
187 aponeurosis and the TMT and attached to a 50-pound load cell (MTS Systems Corp; Eden Prairie,  
188 MN, United States). The upper clamp gripped the entire aponeurosis of each sample, leaving only  
189 the free tendon exposed to loading. The tendon force-length properties were quantified by loading  
190 the tendon cyclically (20 cycles) to 4% strain. The tendon force-length curves were calculated by  
191 averaging the data from last 5 cycles of the loading protocol. Tendon force-strain curves were  
192 calculated by normalizing displacement by the length of the tendon,  $T_L$ , measured to the nearest 0.1  
193 mm with calipers while under zero force in the material testing setup. Average values for tendon  
194 stiffness given in Table 1 were calculated from the slope of the tendon force-length curve across the  
195 last 50 points measured in the last 5 cycles of trials, at strain between 3 and 5%.

196 *Tendon Slack Length.* The tendon slack lengths for the LG and MG were estimated from experimental  
197 measures as described in Appendix A. Because model based estimates of muscle fiber length in a

198 given posture are particularly sensitive to the tendon slack length [55–57] and our calculations  
199 involved several simplifying assumptions, we further refined our experimental estimates of tendon  
200 slack length by fine-adjusting the tendon slack length parameter in the OpenSim model (see  
201 Appendix A for experimental tendon slack length measurement and see below and Appendix B for  
202 model development). After experimental moment arms and tendon and muscle properties were  
203 added to subject specific models, each model was posed in the individual’s fixed posture. The  
204 model’s tendon slack length was adjusted iteratively in the model until the LG and MG normalized  
205 fiber lengths were within 1% of the experimentally measured values. These final values are listed in  
206 Table 2.

### 207 **Quantifying the influence of restricted jumping on energy storage capacity**

208 We generated a flock of subject-specific musculoskeletal models by modifying the generic model  
209 [58] to match experimental values measured for each bird (see Appendix B). With these models, we  
210 quantified the capacity of each subject-specific model to store elastic energy in its Achilles tendon  
211 across a range of joint postures [Ankle° : 31 to 145, Knee°: -145 to -15, Figure 2 [58]]. At each  
212 posture, the simulated LG and MG were activated at 100% and the muscle-tendon unit was  
213 equilibrated with the OpenSim MATLAB `equilibrateMuscles()` function, which adjusts muscle and  
214 tendon length such that tendon force and muscle (active and passive) forces balance. The LG and  
215 MG insert on the same tendon but, due to OpenSim modeling constraints, these muscles are  
216 modeled as having separate tendons. To calculate the stored elastic energy in the combined Achilles  
217 tendon, then, we first extracted the resulting force,  $f_i$ , along the tendon for each muscle. These  
218 values were summed and the resulting tendon strain in a single tendon,  $\epsilon_{Ta}$ , was found from the  
219 inverse of the experimentally measured force-strain curve.

$$\varepsilon_{Ta} = g^{-1}(f_a). \quad (3)$$

220 The strain energy stored in the strain of the tendon,  $PE$  (eq. 10), was calculated by integrating the  
221 tendon force-strain curve from zero to the calculated strain and multiplying that by the tendon  
222 sample length,  $L_T$ , as measured at zero strain during the material testing.

$$PE = L_T \int_0^{\varepsilon_{Ta}} g(\varepsilon) d\varepsilon \quad (4)$$

223 Simulations of 100% activation of the LG and MG were performed across the range of  
224 experimentally measured joint angles for the ankle and knee joint (Figures 2A&B). From these  
225 simulations, we extracted the maximum elastic energy storage across all postures for each bird and  
226 the ankle and knee angles at which the maximum was achieved, and recorded the values in a pre-  
227 jump posture (Figure 2C, [31]). Tendon elastic energy stored in the pre-jump posture has been  
228 found to be a requirement for the very high power generated in guinea fowl jumping [31,37].  
229 Additionally, we recorded the normalized fiber length for each muscle at this posture at zero  
230 activation.

### 231 **Statistical Tests**

232 To determine whether components of the gastrocnemius elastic system change systematically in  
233 response to changes in demand, we evaluated the influence of treatment group (restricted vs.  
234 control) on each element of morphology measured. This was accomplished using t-tests if the  
235 homogeneity of variance assumption test was passed and using a Kruskal-Wallis test by ranks when  
236 this criterion was not met. Non-parametric analyses are indicated with an asterisk after the p-value  
237 in Tables 1&2. The threshold for statistical significance was set at 0.005 after a Bonferroni  
238 correction for multiple comparisons. Likewise, the relationship between treatment group and elastic

239 energy storage capacity was evaluated with a t-test after data passed tests for normality and  
240 homogeneity of variance, as described above for evaluation of differences between groups of  
241 individual elastic system components.

242 We used stepwise comparison of Akaike information criterion (AIC) values [stepAIC R Mass  
243 package [59]] to determine the parameters and coefficients of the full model that best predicted  
244 elastic energy storage potential across natural variation of joint postures in preparation for jumps.  
245 The full statistical model evaluated included stored strain energy,  $PE$ , as a dependent factor and, as  
246 potential independent variables, tendon stiffness,  $tendonK$ , the summed maximum isometric force  
247 capacity of LG and MG along the tendon,  $sumFMax$ , the average LG and MG optimal fascicle  
248 length,  $avOFL$ , and starting muscle length at zero activation of the LG and MG in the pre-jump  
249 posture,  $AvLenA0c$ . We included possible interaction terms between muscle force capacity, tendon  
250 stiffness and muscle start length ( $sumMaxF*tendonK*AvLenA0c$ ) and between optimal fascicle length  
251 and tendon stiffness ( $avOFL*tendonK$ ) following recommendations by Zajac [60] of functional  
252 equivalent muscle tendon joint properties. We did not include muscle moment arm or tendon slack  
253 length in the statistical model because they both contributed to the starting muscle length at any  
254 given joint posture.

255 To quantify the relative explanatory power of morphological variation of any individual element to  
256 predict stored energy to a systems level approach, we compared individual parameter models to the  
257 best multi-parameter model found by stepwise comparisons described above. The AIC value of the  
258 best model was compared to AIC values of models with individual predictors and their relative  
259 explanatory power computed [61] .

260 The relationship between Achilles tendon elastic energy storage capacity and experimentally  
261 measured muscle-mass-normalized peak power output and jump work were both tested with a linear

262 model with elastic energy storage as the dependent variable and peak power or jump work as the  
263 independent variable. See [62] for details on how power and work were calculated from force plate

Table 1: Morphological and functional measures by treatment. All values are given as means +/-standard deviations. 'pVal' column lists the p-value of statistical comparisons between groups. Bolded rows show statistically significant differences between groups. \* indicates data reproduced from Cox et al. (2020).

|                                         | Restricted      | Control         | pVal          |
|-----------------------------------------|-----------------|-----------------|---------------|
| Total animals                           | 8               | 8               |               |
| Body mass kg                            | 1.7±0.11        | 1.7±0.14        | 0.5           |
| Extensor muscle mass kg                 | 0.239(0.022)    | 0.257(0.02)     | 0.18          |
| Average moment arm cm                   | 0.91±0.05       | 0.94±0.03       | 0.24          |
| Tendon stiffness kN/m                   | 48.1±13         | 53.5±10         | 0.39          |
| Leg length mm                           | 345±11          | 349±18          | 0.56          |
| Femur length/leg length                 | 0.25±0.01       | 0.25±0.01       | 0.18          |
| Tibia length/leg length                 | 0.36±0.01       | 0.35±0.01       | 0.1           |
| Tmt length/leg length                   | 0.22±0.01       | 0.22±0.01       | 0.55          |
| Toe length/leg length                   | 0.17±0.01       | 0.17±0.01       | 0.63          |
| *Jumps/day during growth                | 0               | 194(349)        |               |
| <b>At maturity</b>                      |                 |                 |               |
| <b>*Max jump takeoff velocity m/s</b>   | <b>3.3±0.43</b> | <b>4.0±0.36</b> | <b>0.007</b>  |
| <b>*Jump work J/kg</b>                  | <b>37±9.2</b>   | <b>50±8.4</b>   | <b>0.013</b>  |
| <b>*Peak power W/kg</b>                 | <b>787±165</b>  | <b>1171±117</b> | <b>3.5e-4</b> |
| <b>*Peak jump force/body weight N/N</b> | <b>4.7±0.54</b> | <b>6.7±0.74</b> | <b>5e-5</b>   |

264 data.

## 265 Results

### 266 Variation in individual elements of the elastic system

267 We found no statistically significant differences in any individual morphological property between  
268 birds that jumped during growth and those that did not (all  $p \geq 0.1$ , Tables 1&2).

269

### 270 Energy storage capacity between groups

271 We found no significant differences in the capacity to store energy in the strain of elastic elements  
272 between birds restricted and unrestricted from high power activities during maturation, despite

273 small differences in tendon strain that did not reach significance  
 274 (Table 3, Figure 3). This held true both at the peak crouched  
 275 posture before jump initiation (Figure 2C,  $p=0.43$ ) and at the  
 276 posture that optimized elastic energy storage (Figure 2D,  
 277  $pVal=0.44$ ). It should be noted that the optimum posture for  
 278 elastic energy storage was at the most extended knee angle and the  
 279 most flexed ankle angle tested and was  $\sim 85^\circ$  more extended ankle  
 280 angle than birds used in preparation for a jump. While this more  
 281 extended posture lengthened the gastrocnemius and increased the  
 282 energy stored in the Achilles, it shortened the operating length of  
 283 the knee extensor muscles, reducing their force-generating  
 284 capacity. In the prejump posture, the shorter gastrocnemius length  
 285 decreases elastic storage capacity by 12% for control birds and  
 286 10% for restricted birds (Table 3) in comparison to the optimal posture for energy storage.

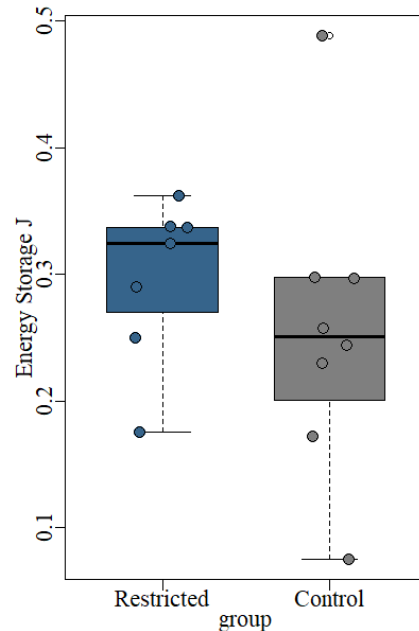

Figure 3: Restricting high power activities does not decrease or significantly influence the capacity to store elastic strain energy. Each dot represents data from one individual.

## 287 Morphological predictors of elastic energy storage capacity

Table 2: Muscle morphological data by treatment for the lateral (LG) and medial (MG) gastrocnemius muscles: Muscle mass (Mass g), optimal fascicle length, ( $L_O$  mm), Maximum Isometric Muscle force (Max Iso Force N), muscle pennation angle at optimal fiber length (Penn Ang rad), and tendon slack length (Tendon SL mm). Morphological measures did not vary between groups. All values are given as means +/- standard deviations. pVal column lists the p-value of statistical comparisons between groups.

|    |                 | Restricted | Control   | pVal |
|----|-----------------|------------|-----------|------|
| LG | Mass g          | 9.0±1.3    | 9.2±1.5   | 0.77 |
|    | $L_O$ mm        | 24±2.9     | 24±4.1    | 0.95 |
|    | Max Iso Force N | 105±15     | 110±22    | 0.64 |
|    | Pen Ang rad     | 0.33±0.05  | 0.30±0.07 | 0.38 |
|    | Tendon SL mm    | 135±7.3    | 139±6.5   | 0.32 |
| MG | Mass g          | 11±1.4     | 12±1.8    | 0.2  |
|    | OFL mm          | 28±4.2     | 29±3.5    | 0.81 |
|    | Max Iso Force N | 108±20     | 118±29    | 0.44 |
|    | Pen Ang rad     | 0.20±0.03  | 0.21±0.03 | 0.51 |
|    | Tendon SL mm    | 150±8.3    | 150±9.1   | 0.97 |



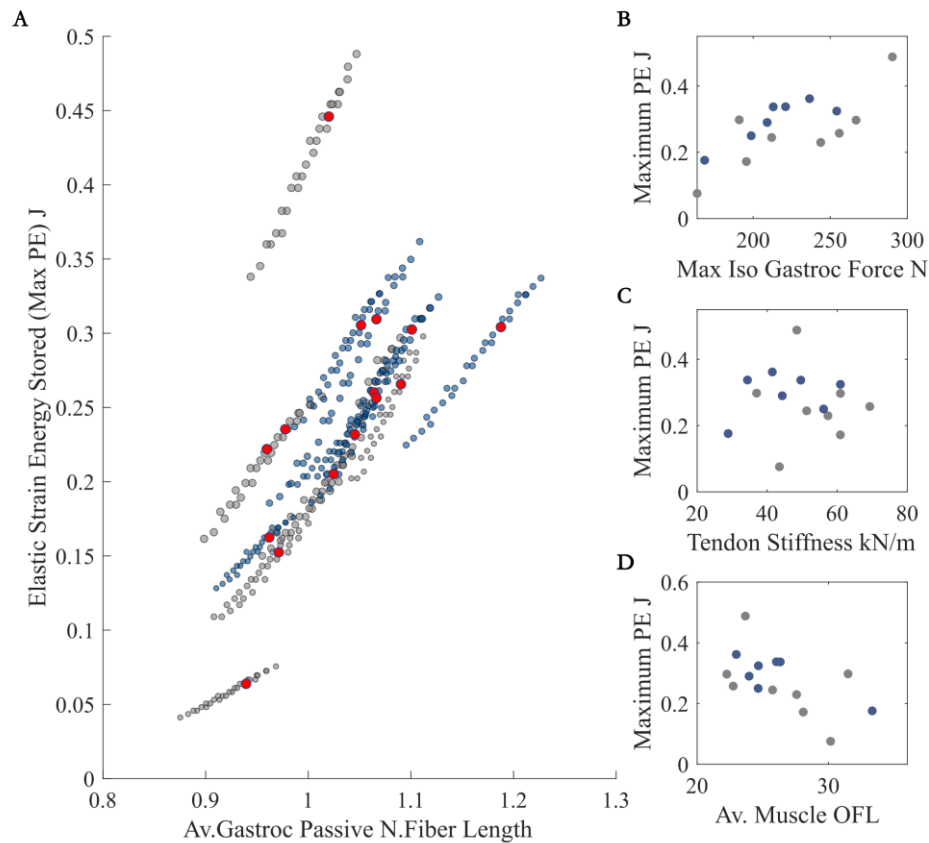

Figure 4: Energy stored in the tendon increases with passive normalized fiber length (length at onset of muscle activation) across different postures (A) and muscle force capacity (B), decreases with muscle optimal fiber length (D), but did not consistently vary with tendon stiffness (C). The variable that most predicts elastic strain energy is muscle normalized fiber length at activation onset (A), with muscles operating at longer lengths enabling greater elastic energy storage. Color designates group (blue: restricted, grey: control). In A), red dots identify the strain energy stored and normalized fiber length in the pre-jump posture. In B, C, and D each marker represents data from one individual.

294 the tendon was the next most explanatory variable and, like normalized muscle length, shows a  
295 positive relationship with energy storage (Figure 4B). In contrast, longer muscle optimal fascicle  
296 lengths reduced energy storage (pVal: 0.03, Table 4, Figure 4D) when evaluated as an individual  
297 predictor, but was not a significant factor as a predictor in the full multi-parameter model. Opposite  
298 to our predictions, tendon stiffness did not significantly correlate with elastic strain energy when  
299 evaluated as an individual predictor (pVal>0.1 Table 4, Figure 4C), but did improve the explanatory  
300 power of a full model. The stepwise AIC comparison of full and reduced models found the sum of  
301 LG and MG maximum force capacity along the tendon,  $sumFMax$ , average optimal fascicle length,



302 *avOFL*, muscle length at activation onset, *avLenA0*,  
303 tendon stiffness and the interaction of tendon  
304 stiffness and muscle force capacity as the  
305 independent predictors that best correlated with  
306 stored elastic strain energy. The relative  
307 explanatory power of each predictor following  
308 similar patterns as seen in the individual analyses  
309 with muscle start length and force capacity  
310 showing the greatest predictive power. This full  
311 model had an  $R^2$  of 0.93 and was over 280,000  
312 times more likely to explain the variation in strain  
313 energy than any model with only one explanatory  
314 variable.

### 315 Energy storage capacity vs jump performance

316 We found little to no correlation between energy storage capacity predicted by simulations and  
317 experimentally collected jump metrics of either muscle mass-specific work or power (Figure 5). A  
318 linear model showed no significant relationship between either peak power jump power per kg of  
319 muscle mass capacity ( $t = -0.36$ ,  $p = 0.72$ ,  $\text{Adj } R^2 = -0.07$ ) or jump work ( $t = -0.05$ ,  $p = 0.96$ ,  $\text{Adj } R^2 = -$   
320  $0.08$ ) and strain energy in the pre-jump posture. The negative adjusted  $R^2$  values for both tests  
321 shows that the variation in jump work or peak power explains only a negligible amount of variation  
322 in elastic energy storage potential. The scatterplot of standardized predicted values versus  
323 standardized residuals for both variables showed that the data met the assumptions of homogeneity  
324 of variance and linearity and the residuals were approximately normally distributed.

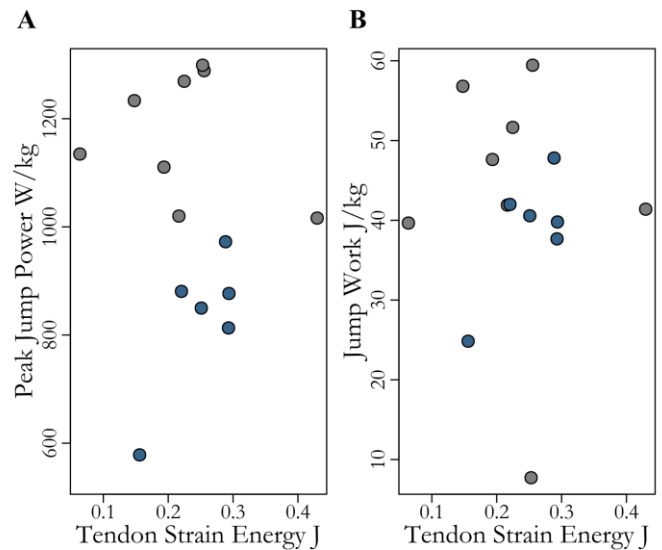

Figure 5: Neither peak jump power nor jump work increase systematically with maximum tendon strain energy across all individuals. Markers designate data from one individual in pre-jump posture and color differentiates treatment groups (grey: control, blue: restricted)

325

## 326 **Discussion**

327 We found the gastrocnemius elastic system of the guinea fowl robust to variations in locomotor  
328 conditions during growth. Neither properties of individual components nor energy storage capacity  
329 varied between groups of birds which did and did not jump throughout maturation. Nor did we  
330 find any correlation between energy storage capacity and jump performance. Variation in muscle  
331 operating length across individuals predicted energy storage capacity better than any fixed  
332 morphological property and a systems approach incorporating multiple components was  
333 substantially able to predict energy storage capacity better than variation along any individual  
334 element.

### 335 **Do components of the gastrocnemius elastic system change systematically in response to** 336 **changes in power and work demand during growth?**

337 Contrary to our predictions, we saw, in general, no systematic changes between the gastrocnemius  
338 elastic system in response to decreased demand for high power and work activities during  
339 maturation. Surprisingly, birds that were restricted from jumping throughout their entire growth  
340 period (Table 1) developed elastic systems that were largely indistinguishable from the control group  
341 that jumped, on average, almost 200 times a day and exhibited greater peak jumping power and work  
342 at adulthood (Tables 1&2). Nor did we see differences in body mass, extensor muscle mass, tendon  
343 stiffness or leverage (moment arm and/or bone lengths).

344

345 Two factors may account for why we saw no systematic changes in the elastic system while  
346 observations of morphological plasticity in response to changes in functional demand abound [63–

347 67], even in guinea fowl in particular [43,68]. First, several studies suggest that plasticity may vary by  
348 life stage, with lower or inconsistent plasticity in growing animals [69–71]). Thus, the inconsistency  
349 between the lack of plasticity in our study and the morphological variation found by others suggests  
350 that guinea fowl may exhibit lower plasticity during maturation than in adulthood. Fast-growing  
351 species, like guinea fowl, might outpace environmental fluctuations with rapid growth and not invest  
352 in developmental plasticity [72,73]. A slow growing species (humans for example) might have a  
353 selective advantage with greater developmental plasticity. Thus, while our treatment may have been  
354 powerful enough to induce morphological changes in adults, rapidly growing guinea fowl may be  
355 more robust to environmental perturbations.

356  
357 Second, our results could be consistent with the results of other studies if the plastic response to  
358 decreased demand is not inferable from changes in response to increases in demand. For example, it  
359 may be that the increase in muscle mass that occurs in response to a certain *increase* in functional  
360 demand is greater than the decrease in muscle mass that occurs in response to the equivalent *decrease*  
361 in demand. Many studies find clear evidence of morphological plasticity, but this was in response to  
362 increased mechanical load [24,43,66,68,74,75] and extreme disuse [76–78]. Our intervention,  
363 however, eliminated jumping and while maintaining consistent low intensity exercise (i.e. walking)  
364 and thus we did not induce chronic offloading, as had been the goal in several previous disuse  
365 studies. Our results suggest that there may not be a linear dose-response relationship between  
366 changes in functional demand and morphological variation. Instead, as recently suggested [25], there  
367 may be a range of variation in demand that is not extreme enough to induce physiological or  
368 morphological modification above those under developmental control. If this region of stasis  
369 encompasses a wider range of disuse, it could explain both why offloading studies often require  
370 extreme disuse, like bedrest or limb immobilization [76,77,79], to induce change and why we found

371 no systematic morphological changes here. Eliminating jumping may not be an extreme enough  
372 disuse signal to induce musculoskeletal plasticity.

373

374 Thus, while we found no systematic morphological variation when restricting high power activities  
375 during maturation, this does not necessarily imply that the morphology of elastic systems does not  
376 plastically adapt to variations in functional demand. But it does suggest that there are conditions in  
377 which elastic systems may be insensitive to functional variation.

378

379 **Is the energy storage capacity reduced in individuals that did not jump during growth?**

380 Despite this lack of consistent morphological variation between our treatment groups, restricted  
381 birds generated lower absolute and muscle-mass-specific power and work during jumping. This  
382 suggests either that small morphological changes in individual elastic elements compound to alter  
383 elastic system function, that variations are significant in other MTU's that we did not quantify, or  
384 that behavioral or neural variation account for the difference in jumping performance. Our systems  
385 level analysis aimed to specifically address the question of whether morphological variation  
386 compound within the elastic system to enable unrestricted birds to store more energy in their  
387 Achilles tendon in preparation for a jump. Again, contrary to our predictions, simulations in our  
388 subject-specific models resulted in no differences between groups in their ability to store elastic  
389 energy. Taken together, the finding of minimal changes to individual muscle-tendon unit  
390 components, and no effect on the overall elastic energy storage, could indicate that morphology  
391 necessary to enable jumping is highly conserved. This could happen if rapid movements are very  
392 critical to fitness, as may be the case for prey animals for whom evasion is critical.

393 **Which type of morphological variation has the greatest influence on energy storage**  
394 **capacity?**

395 The first two analyses focus on plasticity of elastic systems and quantified the influence of rearing  
396 conditions on the morphology of individual components and how that variation influenced energy  
397 storage capacity across treatment groups. Our last two analyses utilize the variation within and  
398 across our treatment groups to further probe the relationship between form and function in elastic  
399 systems.

400 Evaluating the best predictors of energy storage, we found that muscle properties far outweighed the  
401 influence of tendon stiffness. Surprisingly, maximum isometric muscle force, while correlating with  
402 energy storage, was not the most important factor. Instead, normalized muscle length at the start of  
403 contraction was the best individual predictor of energy storage, with the longest normalized muscle  
404 lengths enabling greatest elastic storage [(in agreement with results from [28,80]). This may be  
405 because muscles that start contracting on the descending or plateau region of the force length curve  
406 increase force capacity as they shorten, resulting in a greater equilibrium force, while muscles starting  
407 on the ascending limb of the force-length curve lose force capacity as they shorten against a tendon  
408 during an isometric contraction [58]. Further, we were particularly surprised to find that tendon  
409 stiffness alone had little to no predictive power of energy storage. Together these data suggest that,  
410 between individuals or across an individual's lifetime, the large variation in force capacity due to  
411 force-length or force velocity effects may overshadow the influence of variation in tendon properties  
412 in determining tendon strain energy. This conclusion is consistent with studies in humans that  
413 found no correlation between tendon stiffness and vertical jump height [40]. Yet, this idea runs  
414 contrary to the focus on spring properties [23,27,39,81–85] or relative spring and maximal muscle  
415 properties [3,75] in many studies that try to connect form and function in elastic systems. Our

416 results suggest that instead, between or within individuals, elastic energy storage capacity may be  
417 more sensitive to variations that alter muscle operating lengths (tendon slack length, optimal fascicle  
418 lengths, joint postures) or cross-sectional area than changes in the tendons themselves.

419 Further, our results also highlight the importance of analyzing the components of an elastic system  
420 in concert rather than trying to infer performance from variation in one component. Our full model  
421 that included both muscle (max muscle force and starting length) and tendon properties explained  
422 changes in energy storage capacity over 280,000 times better than variation in any individual  
423 property, even when penalizing models for complexity. This, again, emphasizes the limitations of  
424 reductionist approaches to understanding how musculoskeletal morphological variation influences  
425 the energy storage capacity of an elastic system.

#### 426 **Does elastic energy storage capacity predict peak jump powers and work?**

427 The finding that maximum energy storage capacity of the gastrocnemius elastic system did not  
428 predict jump performance further supports the conclusion of the need to switch our focus from  
429 individual elements to analyzing the elastic system encompassing both morphology and neural  
430 control. Contrary to our expectations, individuals who developed elastic systems capable of storing  
431 greater energy in their tendons did not take advantage of that ability to produce more powerful  
432 jumps. This suggests that morphology may play a smaller role than neural control in determining  
433 contribution of elastic energy storage in jumping. Musculoskeletal morphological variation may not  
434 be the main factor limiting jump performance.

435 The interaction between tendon and muscle force-length curves may, in part, provide a mechanistic  
436 explanation for this disconnect between morphology and performance. Here we include a  
437 conceptual diagram to illustrate this (Figure 6). If we plot the muscle and tendon force-length curves  
438 on the same figure, it is possible to visualize how they might interact. If the muscle operates on the  
439 ascending or plateau region of the force length curve where passive forces are minimal, and we  
440 assume that there is no slack in the tendon, a tendon strain of zero will coincide with the muscle  
441 length at the start of a contraction. Any tendon strain, then, is equal and opposite to the change in  
442 muscle length. During a fixed end contraction, the maximal tendon strain occurs when the tendon  
443 force equals the total muscle force of the three heads of the gastrocnemius (empty circles, Figure 6).  
444 The tendon strain at equilibrium, then, is dramatically influenced by the length of the muscle when it  
445 begins to contract (Figure 6A), reaching higher values for contractions starting at longer muscle  
446 lengths. As our results suggest (and as can be visualized by comparing the differences in the areas of

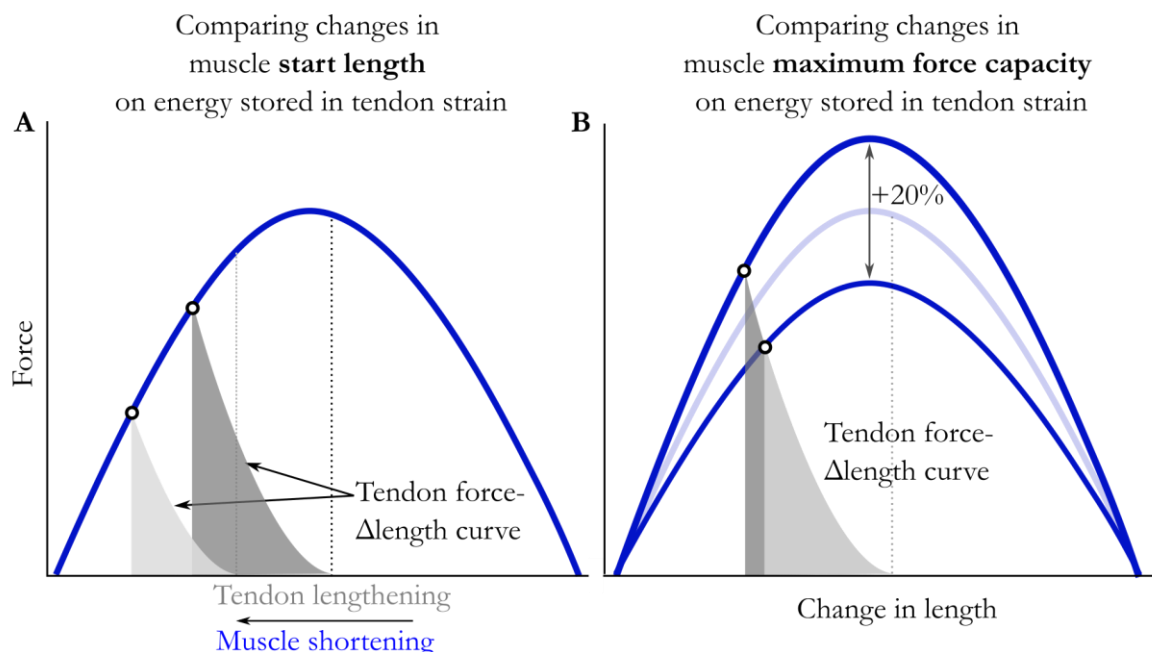

Figure 6: The energy stored in the tendon during a fixed end contraction is constrained by the interaction of the muscle (blue curve) and tendon force- $\Delta$  length curves (grey curve). Since tendon length changes must equal and opposite to muscle length changes, we can plot them at the same scale. Changes in muscle length at the onset of contraction (A) can have a larger influence on energy storage than variations in muscle force capacity (B). The variation in maximum muscle force depicted here represent variation observe in our subjects. Here changes in start length ( $\sim 0.9$ - $1.2$ ) and muscle force capacity ( $\pm 10\%$ ) reflect experimentally measured variation in our population.

447 the grey shaded regions between Figure 6A and B), these dynamics can be larger than the influence  
448 of naturally occurring variations in maximal force capacity (Figure 6B). And while muscle operating  
449 lengths are constrained by morphology (OFL, pennation angle and moment arms), they are also  
450 easily varied with joint angle. Large variations in maximum muscle force could be compensated for  
451 by small variations in posture largely under neural control. Thus, as our results suggest, dynamic  
452 factors like muscle operating length may influence energy storage more than temporarily fixed  
453 musculoskeletal features like maximum muscle force capacity.

454 This suggests that there may be a large range of morphological variation that can be compensated  
455 for with neural plasticity and brings up questions of how the two interact. Does variation along a  
456 particular morphological axis correlate with systematic changes in neural control? If so, how do  
457 individuals search through the neural possibility space? What are the limits of neural compensation?  
458 Do we see greater morphological plasticity of the components of elastic systems in conditions that  
459 push the limits of neural plasticity?

#### 460 **Potential interactions between musculoskeletal and neural variation in elastic energy** 461 **storage**

462 This possible sensitivity of performance to muscle operating lengths also suggests directions for  
463 further studies exploring the interaction between morphological and neural or kinematic variation.  
464 Here we assumed a uniform pre-jump posture across individuals based on measured average values  
465 [31]. Yet our results suggest variations in posture between individuals may play an important role in  
466 understanding the relationship between form and function in elastic systems. For instance, one  
467 could explore whether individuals with shorter muscle operating lengths adopt a less flexed posture  
468 to enable greater tendon energy storage in preparation for a jump. Likewise, the addition of a  
469 counter movement preceding a jump, not common in guinea fowl [31,37] but present in many



470 other species [86,87], could minimize influence of muscle constraints on energy storage. This  
471 dependence of performance on the interaction between morphology and neural control again  
472 reinforces the need to expand our scope from that of the muscle-tendon unit to that of the elastic  
473 system.

474 Therefore, while musculoskeletal morphology may set the bounds of possible energy storage,  
475 individuals may not operate at their limits of elastic potential. This suggests either a significant  
476 behavioral component (restricted birds simply may have not tried as hard to jump) or that there may  
477 be benefits to real-time tunability in elastic systems. The jump of a guinea fowl is powered both by  
478 tendon recoil and simultaneous muscle work [31], as is common in many larger animals [86–89]. The  
479 muscles that load the tendon pre-jump also contract during takeoff to contribute power to the jump.  
480 In these hybrid systems, trade-offs between maximizing tendon strain energy and muscle power may  
481 explain our findings that the pre-jump posture of guinea fowl did not optimize energy storage in the  
482 tendon. Adjusting muscle lengths to maximize tendon strain may hamper muscles fiber work during  
483 takeoff. Further, in a complex system such as this, with dozens of individual muscle-tendon units  
484 spanning multiple joints and working in concert with direct drive muscles with little tendon, the  
485 difference between a great jumper and a good jumper might depend less on the maximal storage  
486 capacity of any one muscle tendon unit (i.e. its musculoskeletal morphology) and more on fine  
487 adjustments of neural control to harmonize the output of the collective system [90–92].

488  
489 Together, our experimental and modeling analyses suggest that performance advantage of the  
490 control birds, who practiced jumping throughout maturation, may lie less in the body's modification  
491 of individual elastic elements, and instead, in the fine tuning of neural circuits to coordinate muscle  
492 activation timing to take better advantage of what they each possess. While restricting normal  
493 locomotor behavior during growth (i.e., eliminating practice) likely leads to deficits in neural control,

494 neural plasticity is potentially a rapidly reversible pathway to adapt an elastic system to functional  
495 variation. Given the potential short timescale of neural plasticity [92,93], greater sensitivity of neural  
496 locomotor/movement stimuli could allow the individual to adjust the dynamics of an elastic system  
497 during growth without making potentially irreversible changes to morphology that could be  
498 detrimental in subsequent stages of growth or in adulthood if environmental conditions or  
499 functional demand rapidly change. Thus, one could interpret the results of our study as suggesting  
500 that practice during growth may indeed be more related to forming the neural framework for  
501 jumping than for forming the musculoskeletal framework. This also suggests the specific hypothesis  
502 that individuals restricted from an activity during growth may be capable of reversing the resulting  
503 neural deficits with practice later in life.

#### 504 **Limitations**

505 Several modeling simplifications could have influenced our results. For instance, the gastrocnemius  
506 elastic system is not the only one that could contribute to jump power. While the Achilles is the  
507 largest tendon involved, many other digital tendons spanning both the ankle and tarsometatarsus  
508 joint have the potential to contribute to jump power but were not included in our analysis  
509 Furthermore, changes in the characteristics of muscles spanning proximal joints may also have  
510 contributed to the differences in jump power but these muscles were not modeled. Additionally,  
511 potentially important dynamic effects were ignored. For simplicity, we simulated the amount of  
512 energy stored in the Achilles tendon during fixed-end contractions, where the joint posture was  
513 constant as the muscle and tendon dynamically responded to increasing muscle activation.  
514 Activating muscles while altering joint posture would alter these dynamics, perhaps amplifying the  
515 influence of individual differences in input or output lever lengths or force-velocity effects not  
516 apparent from group averages. Likewise, we did not measure and include individual variation in

517 muscle/aponeurosis passive elastic properties that could significantly alter energy storage [36,94,95].  
518 While this is a common approach in musculoskeletal modeling [50,60,96], variation in the  
519 aponeurosis and free tendon stiffness [97,98] have the potential to introduce errors [16,99].  
520 Another possible limitation was the modeling choice to focus on the potential for an individual to  
521 store energy in the strain of their tendon. How that energy is released and how that energy release  
522 interacts with synchronous muscle activation could also influence jump performance [5]. Because  
523 jumps are likely powered both by tendon recoil and muscle work [31,80], there may be a tradeoff  
524 between the work the muscle puts into tendon strain and that which is left available to power the  
525 jump during tendon recoil [100]. Future work could involve simulation of jumps in these subject-  
526 specific models to assess the contributions of these dynamic factors. Thus, while we found no  
527 consistent change in components of the gastrocnemius elastic system due to decreased demand for  
528 high power activities during growth, more complex models may provide insight into the ways in  
529 which morphological variation constrains performance.

### 530 **Summary**

531 We found that decreasing the demand for high power and work during growth can influence adult  
532 performance but does not necessarily lead to morphological plasticity. We found no difference in  
533 energy storage capacity between groups which did and did not jump throughout maturation or any  
534 correlation with experimentally measured jump performance. We conclude that gastrocnemius  
535 elastic system in the guinea fowl displays little to no morphological plastic response to decreased  
536 demand during growth and that neural control of elastic systems may constrain performance more  
537 than morphology.

### 538 **Author Contributions**

539 SMC, JR, SJP, MQS contributed to the conception and design of the study. JR, MQS, SJP and SMC  
540 developed methodologies and KK, AD, MQS, SMC collected the data. SMC, MQS analyzed the  
541 data and SMC prepared the figures. SMC and JR drafted the initial manuscript. All authors  
542 contributed to manuscript editing and approved the final manuscript.

## 543 **Funding**

544 This study was supported in part through a seed grant from the Center for Human Evolution and  
545 Diversity, The Pennsylvania State University, and through the National Institute of Arthritis and  
546 Musculoskeletal and Skin Diseases of the National Institutes of Health under grant number  
547 R21AR071588. The content is solely the responsibility of the authors of this paper and does not  
548 necessarily represent the views of the National Institutes of Health.

## 549 **Conflict of Interest**

550 The authors declare that the research was conducted in the absence of any commercial or financial  
551 relationships that could be construed as a potential conflict of interest.

## 552 **Data Availability**

553 TBD

## 554 **References**

- 555 1. Patek SN, Dudek DM, Rosario M V. 2011 From bouncy legs to poisoned arrows: Elastic  
556 movements in invertebrates. *J. Exp. Biol.* **214**, 1973–1980. (doi:10.1242/jeb.038596)
- 557 2. Roberts TJ, Azizi E. 2011 Flexible mechanisms: the diverse roles of biological springs in  
558 vertebrate movement. *J. Exp. Biol.* **214**, 353–61. (doi:10.1242/jeb.038588)

- 559 3. Lichtwark GA, Wilson AM. 2008 Optimal muscle fascicle length and tendon stiffness for  
560 maximising gastrocnemius efficiency during human walking and running. *J. Theor. Biol.* **252**,  
561 662–673. (doi:10.1016/j.jtbi.2008.01.018)
- 562 4. Wilson AM, Van den Bogert AJ, McGuigan MP. 2000 Optimization of the muscle-tendon  
563 unit for economical locomotion. In *Skeletal muscle mechanics: from mechanism to function* (ed W  
564 Herzog), pp. 517–47. Hoboken, NJ: John Wiley & Sons.
- 565 5. Ilton M *et al.* 2018 The principles of cascading power limits in small, fast biological and  
566 engineered systems. *Science (80-. )*. **360**. (doi:10.1126/science.aao1082)
- 567 6. Richards CT, Sawicki GS. 2012 Elastic recoil can either amplify or attenuate muscle-tendon  
568 power, depending on inertial vs. fluid dynamic loading. *J. Theor. Biol.* **313**, 68–78.  
569 (doi:10.1016/j.jtbi.2012.07.033)
- 570 7. Astley HC, Roberts TJ. 2014 The mechanics of elastic loading and recoil in anuran jumping.  
571 *J. Exp. Biol.* **217**, 4372–4378. (doi:10.1242/jeb.110296)
- 572 8. Astley HC, Roberts TJ. 2012 Evidence for a vertebrate catapult: elastic energy storage in the  
573 plantaris tendon during frog jumping. *Biol. Lett.* **8**, 386–9. (doi:10.1098/rsbl.2011.0982)
- 574 9. Galantis A, Woledge RC. 2003 The theoretical limits to the power output of a muscle –  
575 tendon complex with inertial and gravitational loads. , 1493–1498.  
576 (doi:10.1098/rspb.2003.2403)
- 577 10. Robertson BD, Sawicki GS. 2014 Exploiting elasticity: Modeling the influence of neural  
578 control on mechanics and energetics of ankle muscle-tendons during human hopping. *J.*  
579 *Theor. Biol.* **353**, 121–132. (doi:10.1016/j.jtbi.2014.03.010)

- 580 11. Sawicki GS, Robertson BD, Azizi E, Roberts TJ. 2015 Timing matters: tuning the mechanics  
581 of a muscle-tendon unit by adjusting stimulation phase during cyclic contractions. *J. Exp. Biol.*  
582 **218**, 3150–3159. (doi:10.1242/jeb.121673)
- 583 12. Nishikawa K *et al.* 2007 Neuromechanics : an integrative approach for understanding motor  
584 control. **47**, 16–54. (doi:10.1093/icb/icm024)
- 585 13. Gillis GB, Biewener AA. 2001 Hindlimb muscle function in relation to speed and gait: in vivo  
586 patterns of strain and activation in a hip and knee extensor of the rat (*Rattus norvegicus*). *J.*  
587 *Exp. Biol.* **204**, 2717–2731.
- 588 14. Lutz GJ, Rome LC. 1996 Muscle function during jumping in frogs. I. Sarcomere length  
589 change, EMG pattern, and jumping performance. *Am. J. Physiol.* **271**, C563-70.
- 590 15. Kao P-C, Lewis CL, Ferris DP. 2010 Short-term locomotor adaptation to a robotic ankle  
591 exoskeleton does not alter soleus Hoffmann reflex amplitude. *J. Neuroeng. Rehabil.* **7**, 33.  
592 (doi:10.1186/1743-0003-7-33)
- 593 16. Lieber RL, Roberts TJ, Blemker SS, Lee SSM, Herzog W. 2017 Skeletal muscle mechanics,  
594 energetics and plasticity. *J. Neuroeng. Rehabil.* **14**, 108. (doi:10.1186/s12984-017-0318-y)
- 595 17. Du TY, Standen EM. 2017 Phenotypic plasticity of muscle fiber type in the pectoral fins of  
596 *Polypterus senegalus* reared in a terrestrial environment . *J. Exp. Biol.* **220**, 3406–3410.  
597 (doi:10.1242/jeb.162909)
- 598 18. Estes RR, Malinowski A, Piacentini M, Thrush D, Salley E, Losey C, Hayes E. 2017 The  
599 Effect of High Intensity Interval Run Training on Cross-sectional Area of the Vastus  
600 Lateralis in Untrained College Students. *Int. J. Exerc. Sci.* **10**, 137–145.

- 601 19. Iadecola C, Anrather J, Medical WC. 2015 Dramatic changes in muscle contractile and  
602 structural properties after two Botulinum toxin injections. *Muscle and Nerve* **52**, 649–657.  
603 (doi:10.1038/nm.2399.The)
- 604 20. Bohm S, Mersmann F, Tettke M, Kraft M, Arampatzis A. 2014 Human Achilles tendon  
605 plasticity in response to cyclic strain : effect of rate and duration. , 4010–4017.  
606 (doi:10.1242/jeb.112268)
- 607 21. Docking SI, Cook J. 2019 How do tendons adapt? Going beyond tissue responses to  
608 understand positive adaptation and pathology development: A narrative review. *J.*  
609 *Musculoskelet. Neuronal Interact.* **19**, 300–310.
- 610 22. Eliasson P, Fahlgren A, Pasternak B, Aspenberg P. 2007 Unloaded rat Achilles tendons  
611 continue to grow, but lose viscoelasticity. *J. Appl. Physiol.* **103**, 459–463.  
612 (doi:10.1152/jappphysiol.01333.2006)
- 613 23. Bohm S, Mersmann F, Arampatzis A. 2019 Functional adaptation of connective tissue by  
614 training. *Dtsch. Z. Sportmed.* **70**, 105–109. (doi:10.5960/dzsm.2019.366)
- 615 24. Kubo K, Morimoto M, Komuro T, Yata H, Tsunoda N, Kanehisa H, Fukunaga T. 2007  
616 Effects of Plyometric and Weight Training on Muscle–Tendon Complex and Jump  
617 Performance. *Med. Sci. Sport. Exerc.* **39**, 1801–1810. (doi:10.1249/mss.0b013e31813e630a)
- 618 25. Katugam K, Cox SM, Salzano MQ, De Boef A, Hast MW, Neuberger T, Ryan TM, Piazza SJ,  
619 Rubenson J. 2020 Altering the Mechanical Load Environment During Growth Does Not  
620 Affect Adult Achilles Tendon Properties in an Avian Bipedal Model. *Front. Bioeng. Biotechnol.*  
621 **8**. (doi:10.3389/fbioe.2020.00994)
- 622 26. Mayfield DL, Launikonis BS, Cresswell AG, Lichtwark GA. 2016 Additional in-series

- 623 compliance reduces muscle force summation and alters the time course of force relaxation  
624 during fixed-end contractions. *J. Exp. Biol.* **219**, jeb.143123. (doi:10.1242/jeb.143123)
- 625 27. Albracht K, Arampatzis A. 2006 Influence of the mechanical properties of the muscle-tendon  
626 unit on force generation in runners with different running economy. *Biol. Cybern.* **95**, 87–96.  
627 (doi:10.1007/s00422-006-0070-z)
- 628 28. Rosario M V, Sutton GP, Patek SN, Sawicki GS. 2016 Muscle – spring dynamics in time-  
629 limited, elastic movements. *Proc. R. Soc. B* **283**, 20161561.  
630 (doi:10.6084/m9.figshare.c.3462654.)
- 631 29. Zajac FE. 1992 How musculotendon architecture and joint geometry affect the capacity of  
632 muscles to move and exert force on objects: A review with application to arm and forearm  
633 tendon transfer design. *J. Hand Surg. Am.* **17**, 799–804. (doi:10.1016/0363-5023(92)90445-U)
- 634 30. Ettema GJC. 1996 Elastic and length-force characteristics of the gastrocnemius of the  
635 hopping mouse (*Notomys alexis*) and the rat (*Rattus norvegicus*). *J. Exp. Biol.* **199**, 1277–  
636 1285.
- 637 31. Henry HT, Ellerby DJ, Marsh RL. 2005 Performance of guinea fowl *Numida meleagris*  
638 during jumping requires storage and release of elastic energy. *J. Exp. Biol.* **208**, 3293–3302.  
639 (doi:10.1242/jeb.01764)
- 640 32. Alexander R. 1968 *Animal Mechanics*. University of Washington Press.
- 641 33. Biewener AA, McGowan C, Card GM, Baudinette R V. 2004 Dynamics of leg muscle  
642 function in tammar wallabies (*M. eugenii*) during level versus incline hopping. , 211–223.  
643 (doi:10.1242/jeb.00764)



- 644 34. Walmsley B, Hodgson JA, Burke RE. 1978 Forces produced by medial gastrocnemius and  
645 soleus muscles during locomotion in freely moving cats. *J. Neurophysiol.* **41**, 1203–1216.  
646 (doi:10.1152/jn.1978.41.5.1203)
- 647 35. Farris DJ, Lichtwark GA, Brown NAT, Cresswell AG. 2016 The role of human ankle plantar  
648 flexor muscle-tendon interaction and architecture in maximal vertical jumping examined in  
649 vivo. *J. Exp. Biol.* **219**, 528–534. (doi:10.1242/jeb.126854)
- 650 36. Arellano CJ, Konow N, Gidmark NJ, Roberts TJ. 2019 Evidence of a tunable biological  
651 spring: Elastic energy storage in aponeuroses varies with transverse strain in vivo. *Proc. R. Soc.  
652 B Biol. Sci.* **286**, 3–8. (doi:10.1098/rspb.2018.2764)
- 653 37. Cox SM, Salzano MQ, Piazza SJ, Rubenson J. 2020 Eliminating high-intensity activity during  
654 growth reduces mechanical power capacity but not submaximal metabolic cost in a bipedal  
655 animal model. *J. Appl. Physiol.* **128**, 50–58. (doi:10.1152/jappphysiol.00679.2019)
- 656 38. Biewener A a, Baudinette R. 1995 In vivo muscle force and elastic energy storage during  
657 steady-speed hopping of tammar wallabies (*Macropus eugenii*). *J. Exp. Biol.* **198**, 1829–41.
- 658 39. Biewener AA, Roberts TJ. 2000 Muscle and tendon contributions to force, work, and elastic  
659 energy savings: a comparative perspective. *Exercise Sport Sci. Rev.* **28**, 99–107. (doi:10916700)
- 660 40. Kubo K, Kawakami Y, Fukunaga T, Kawakami Y, Fuku- T. 2019 Influence of elastic  
661 properties of tendon structures on jump performance in humans. , 2090–2096.
- 662 41. Rubenson J, Marsh RL. 2009 Mechanical efficiency of limb swing during walking and running  
663 in guinea fowl (*Numida meleagris*). *J. Appl. Physiol.* **106**, 1618–1630.  
664 (doi:10.1152/jappphysiol.91115.2008)

- 665 42. Rubenson J, Henry HT, Dimoulas PM, Marsh RL. 2006 The cost of running uphill : linking  
666 organismal and muscle energy use in guinea fowl ( *Numida meleagris* ). *J. Exp. Biol.* **209**,  
667 2395–2408. (doi:10.1242/jeb.02310)
- 668 43. Salzano MQ, Cox SM, Piazza SJ, Rubenson J. 2018 American Society of Biomechanics  
669 Journal of Biomechanics Award 2017: High-acceleration training during growth increases  
670 optimal muscle fascicle lengths in an avian bipedal model. *J. Biomech.* **80**, 1–7.  
671 (doi:10.1016/j.jbiomech.2018.09.001)
- 672 44. Azizi E, Deslauriers AR. 2014 Regional heterogeneity in muscle fiber strain: the role of fiber  
673 architecture. *Front. Physiol.* **5**, 303. (doi:10.3389/fphys.2014.00303)
- 674 45. Ahn AN, Monti RJ, Biewener AA. 2003 In vivo and in vitro heterogeneity of segment length  
675 changes in the semimembranosus muscle of the toad. *J. Physiol.* **549**, 877–888.  
676 (doi:10.1113/jphysiol.2002.038018)
- 677 46. Carr JA, Ellerby DJ, Marsh RL. 2011 Differential segmental strain during active lengthening  
678 in a large biarticular thigh muscle during running. *J. Exp. Biol.* **214**, 3386–95.  
679 (doi:10.1242/jeb.050252)
- 680 47. Buchanan TS, Lloyd DG, Manal K, Besier TF. 2004 Neuromusculoskeletal modeling:  
681 Estimation of muscle forces and joint moments and movements from measurements of  
682 neural command. *J. Appl. Biomech.* **20**, 367–395. (doi:10.1016/j.jbbi.2008.05.010)
- 683 48. Mendez J, Keys A. 1960 Density and Composition of Mammalian Muscle. *Metabolism*, 9,  
684 184-188. - References - Scientific Research Publishing. See  
685 [https://www.scirp.org/\(S\(lz5mqp453edsnp55rrgjt55\)\)/reference/ReferencesPapers.aspx?Re](https://www.scirp.org/(S(lz5mqp453edsnp55rrgjt55))/reference/ReferencesPapers.aspx?ReferenceID=1219605)  
686 [ferenceID=1219605](https://www.scirp.org/(S(lz5mqp453edsnp55rrgjt55))/reference/ReferencesPapers.aspx?ReferenceID=1219605) (accessed on 19 August 2020).

- 687 49. Rospars JP, Meyer-Vernet N. 2016 Force per cross-sectional area from molecules to muscles:  
688 A general property of biological motors. *R. Soc. Open Sci.* **3**. (doi:10.1098/rsos.160313)
- 689 50. Millard M, Uchida T, Seth A, Delp SL. 2013 Flexing Computational Muscle: Modeling and  
690 Simulation of Musculotendon Dynamics. *J. Biomech. Eng.* **135**, 021005.  
691 (doi:10.1115/1.4023390)
- 692 51. Spoor CW, van Leeuwen JL. 1992 Knee muscle moment arms from MRI and from tendon  
693 travel. *J. Biomech.* **25**, 201–206. (doi:10.1016/0021-9290(92)90276-7)
- 694 52. Landsmeer JM. 1961 Studies in the anatomy of articulation. 1. The equilibrium of the  
695 ‘intercalated’ bone. *Acta Morphol. Neerl. Scand.* **3**, 287–303.
- 696 53. Salzano M. 2020 Musculoskeletal Plasticity in Response to Loading History during Growth.  
697 The Pennsylvania State University.
- 698 54. Lewis GS, Sommer HJ, Piazza SJ. 2006 In vitro assessment of a motion-based optimization  
699 method for locating the talocrural and subtalar joint axes. *J. Biomech. Eng.* **128**, 596–603.  
700 (doi:10.1115/1.2205866)
- 701 55. De Groote F, Van Campen A, Jonkers I, De Schutter J. 2010 Sensitivity of dynamic  
702 simulations of gait and dynamometer experiments to hill muscle model parameters of knee  
703 flexors and extensors. *J. Biomech.* **43**, 1876–1883. (doi:10.1016/j.jbiomech.2010.03.022)
- 704 56. Ackland DC, Lin YC, Pandy MG. 2012 Sensitivity of model predictions of muscle function  
705 to changes in moment arms and muscle-tendon properties: A Monte-Carlo analysis. *J.*  
706 *Biomech.* **45**, 1463–1471. (doi:10.1016/j.jbiomech.2012.02.023)
- 707 57. Scovil CY, Ronsky JL. 2006 Sensitivity of a Hill-based muscle model to perturbations in

- 708 model parameters. *J. Biomech.* **39**, 2055–2063. (doi:10.1016/j.jbiomech.2005.06.005)
- 709 58. Cox SM *et al.* 2019 The Interaction of Compliance and Activation on the Force-Length  
710 Operating Range and Force Generating Capacity of Skeletal Muscle: A Computational Study  
711 using a Guinea Fowl Musculoskeletal Model. *Integr. Org. Biol.* **1**, 1–20.  
712 (doi:10.1093/iob/obz022)
- 713 59. Venables WN, Ripley BD. 2002 *Modern Applied Statistics with S*. 4th edn. New York: Springer-  
714 Verlag.
- 715 60. Zajac FE. 1989 Muscle and tendon: properties, models, scaling, and application to  
716 biomechanics and motor control. *Crit. Rev. Biomed. Eng.* **17**, 359–411.  
717 (doi:10.1016/j.pcad.2015.11.006)
- 718 61. Wagenmakers E-J, Farrell S. 2004 AIC model selection using Akaike weights. *Psychon. Bull.*  
719 *Rev.* **11**, 192–6.
- 720 62. Cox S, Salzano M, DeBoef A, Piazza S, Rubenson J. 2019 Decreased physical activity during  
721 growth reduces peak force capacity but not running economy in a bipedal animal model. In  
722 *International Society of Biomechanics*, Calgary, Canada.
- 723 63. Blazeovich AJ, Gill ND, Bronks R, Newton RU. 2003 Training-Specific Muscle Architecture  
724 Adaptation after 5-wk Training in Athletes. *Med. Sci. Sports Exerc.* **35**, 2013–2022.  
725 (doi:10.1249/01.MSS.0000099092.83611.20)
- 726 64. Baldwin KM, Haddad F. 2002 Skeletal muscle plasticity: Cellular and molecular responses to  
727 altered physical activity paradigms. *Am. J. Phys. Med. Rehabil.* **81**, 40–51.  
728 (doi:10.1097/00002060-200211001-00006)

- 729 65. Fitts RH, Widrick JJ. 1996 Muscle Mechanics: Adaptations with exercise-training. *Exerc. Sport*  
730 *Sci. Rev.* **24**, 427–474.
- 731 66. Mcdonagh MJN, Davies CTM. 1984 Adaptive response of mammalian skeletal muscle to  
732 exercise with high loads. *Eur. J. Appl. Physiol.* **52**, 139–155.
- 733 67. Wisdom KM, Delp SL, Kuhl E. 2015 Use it or lose it: multiscale skeletal muscle adaptation to  
734 mechanical stimuli. *Biomech. Model. Mechanobiol.* **14**, 195–215. (doi:10.1007/s10237-014-0607-3)
- 735 68. Buchanan CI, Marsh RL. 2001 Effects of long-term exercise on the biomechanical properties  
736 of the Achilles tendon of guinea fowl. *J Appl Physiol* **90**, 164–171.
- 737 69. Legerlotz K, Marzilger R, Bohm S, Arampatzis A. 2016 Physiological Adaptations following  
738 Resistance Training in Youth Athletes—A Narrative Review. *Pediatr. Exerc. Sci.* **28**, 501–520.  
739 (doi:10.1123/pes.2016-0023)
- 740 70. Johnston IA. 2006 Environment and plasticity of myogenesis in teleost fish. *J. Exp. Biol.* **209**,  
741 2249–2264. (doi:10.1242/jeb.02153)
- 742 71. Aucouturier J, Baker JS, Duché P. 2008 Fat and carbohydrate metabolism during submaximal  
743 exercise in children. *Sport. Med.* **38**, 213–238. (doi:10.2165/00007256-200838030-00003)
- 744 72. Dewitt TJ, Sih a, Wilson DS. 1998 Costs and limits of phenotypic plasticity. *Trends Ecol. Evol.*  
745 **13**, 77–81.
- 746 73. Snell-Rood EC. 2012 Selective processes in development: Implications for the costs and  
747 benefits of phenotypic plasticity. *Integr. Comp. Biol.* **52**, 31–42. (doi:10.1093/icb/ics067)
- 748 74. Atherton PJ, Smith K. 2012 Muscle protein synthesis in response to nutrition and exercise. *J.*  
749 *Physiol.* **590**, 1049–1057. (doi:10.1113/jphysiol.2011.225003)

- 750 75. Mersmann F, Charcharis G, Bohm S, Arampatzis A. 2017 Muscle and tendon adaptation in  
751 adolescence: Elite volleyball athletes compared to untrained boys and girls. *Front. Physiol.* **8**.  
752 (doi:10.3389/fphys.2017.00417)
- 753 76. Bajotto G, Shimomura Y. 2007 Determinants of Disuse-Induced Skeletal Muscle Atrophy:  
754 Exercise and Nutrition Countermeasures to Prevent Protein Loss. *J. Nutr. Sci. Vitaminol.*  
755 (*Tokyo*). **52**, 233–247. (doi:10.3177/jnsv.52.233)
- 756 77. Clark BC. 2009 In vivo alterations in skeletal muscle form and function after disuse atrophy.  
757 *Med. Sci. Sports Exerc.* **41**, 1869–1875. (doi:10.1249/MSS.0b013e3181a645a6)
- 758 78. Campbell EL, Seynnes OR, Bottinelli R, McPhee JS, Atherton PJ, Jones DA, Butler-Browne  
759 G, Narici M V. 2013 Skeletal muscle adaptations to physical inactivity and subsequent  
760 retraining in young men. *Biogerontology* **14**, 247–259. (doi:10.1007/s10522-013-9427-6)
- 761 79. Bebout DE, Hogan MC, Hempleman SC, Wagner PD. 1993 Effects of training and  
762 immobilization on VO<sub>2</sub> and DO<sub>2</sub> in dog gastrocnemius muscle in situ. *J. Appl. Physiol.* **74**,  
763 1697–703.
- 764 80. Azizi E, Roberts TJTTJ. 2010 Muscle performance during frog jumping: influence of  
765 elasticity on muscle operating lengths. *Proc. A R. Soc. B* **277**, 1523–1530.  
766 (doi:10.1098/rspb.2009.2051)
- 767 81. Waugh CM, Blazeovich AJ, Fath F, Korff T. 2012 Age-related changes in mechanical  
768 properties of the Achilles tendon. *J. Anat.* **220**, 144–155. (doi:10.1111/j.1469-  
769 7580.2011.01461.x)
- 770 82. Khayeri H, Blomgran P, Hammerman M, Turunen MJ, Löwgren A, Guizar-Sicairos M,  
771 Aspenberg P, Isaksson H. 2017 Achilles tendon compositional and structural properties are

- 772 altered after unloading by botox. *Sci. Rep.* **7**, 1–10. (doi:10.1038/s41598-017-13107-7)
- 773 83. Fletcher JR, MacIntosh BR. 2018 Changes in Achilles tendon stiffness and energy cost  
774 following a prolonged run in trained distance runners. *PLoS One* **13**, 1–17.  
775 (doi:10.1371/journal.pone.0202026)
- 776 84. Proske U, Morgan DL. 1987 Tendon stiffness: Methods of measurement and significance for  
777 the control of movement. A review. *J. Biomech.* **20**, 75–82. (doi:10.1016/0021-9290(87)90269-  
778 7)
- 779 85. Waugh CM, Korff T, Fath F, Blazevich AJ. 2014 Effects of resistance training on tendon  
780 mechanical properties and rapid force production in prepubertal children. *J. Appl. Physiol.* **117**,  
781 257–266. (doi:10.1152/jappphysiol.00325.2014)
- 782 86. Kubo K, Kawakami Y, Fukunaga T. 1999 Influence of elastic properties of tendon structures  
783 on jump performance in humans. *J. Appl. Physiol.* **87**, 2090–2096.  
784 (doi:10.1152/jappl.1999.87.6.2090)
- 785 87. Alexander RM. 1995 Leg design and jumping technique for humans, other vertebrates and  
786 insects. *Philos. Trans. R. Soc. Lond. B. Biol. Sci.* **347**, 235–248. (doi:10.1098/rstb.1995.0024)
- 787 88. Alexander RM. 1974 The mechanics of jumping by a dog. *J. Zool.* **173**, 549–573.
- 788 89. Roberts TJ. 2003 Probing the limits to muscle-powered accelerations: lessons from jumping  
789 bullfrogs. *J. Exp. Biol.* **206**, 2567–2580. (doi:10.1242/jeb.00452)
- 790 90. Häkkinen K, Alen M, Kallinen M, Newton R, Kraemer W. 2000 Neuromuscular adaptation  
791 during prolonged strength training, detraining and re-strength-training in middle-aged and  
792 elderly people. *Eur. J. Appl. Physiol.* **83**, 51–62. (doi:10.1007/s004210000248)

- 793 91. Enoka RM. 1997 Neural Adaptations with Chronic physical activity. *J. Biomech.* **30**, 465–475.
- 794 92. Adkins DL, Boychuk J, Remple MS, Kleim JA. 2006 Motor training induces experience-  
795 specific patterns of plasticity across motor cortex and spinal cord. *J. Appl. Physiol.* **101**, 1776–  
796 1782. (doi:10.1152/jappphysiol.00515.2006)
- 797 93. Yoxon E, Welsh TN. 2019 Rapid motor cortical plasticity can be induced by motor imagery  
798 training. *Neuropsychologia* **134**, 107206. (doi:10.1016/j.neuropsychologia.2019.107206)
- 799 94. Huijing PA, Ettema GJ. 1988 Length-force characteristics of aponeurosis in passive muscle  
800 and during isometric and slow dynamic contractions of rat gastrocnemius muscle. *Acta*  
801 *Morphol. Neerl. Scand.* **26**, 51–62.
- 802 95. Lemos RR, Epstein M, Herzog W. 2008 Modeling of skeletal muscle: The influence of  
803 tendon and aponeuroses compliance on the force-length relationship. *Med. Biol. Eng. Comput.*  
804 **46**, 23–32. (doi:10.1007/s11517-007-0259-x)
- 805 96. Seth A *et al.* 2018 OpenSim : Simulating musculoskeletal dynamics and neuromuscular control  
806 to study human and animal movement. *Comput. Biol.* **14**, e1006223.
- 807 97. Finni T. 2006 Structural and functional features of human muscle-tendon unit. *Scand. J. Med.*  
808 *Sci. Sport.* **16**, 147–158. (doi:10.1111/j.1600-0838.2005.00494.x)
- 809 98. Ettema GJC, Huijing PA. 1989 Properties of the tendinous structures and series elastic  
810 component of EDL muscle-tendon complex of the rat. *J. Biomech.* **22**, 1209–1215.  
811 (doi:10.1016/0021-9290(89)90223-6)
- 812 99. Epstein M, Wong M, Herzog W. 2006 Should tendon and aponeurosis be considered in  
813 series? *J. Biomech.* **39**, 2020–2025. (doi:10.1016/j.jbiomech.2005.06.011)



- 814 100. Sutton GP, Mendoza E, Azizi E, Longo SJ, Olberding JP, Ilton M, Patek SN. 2019  
815 Integrative and Comparative Biology Why do Large Animals Never Actuate Their Jumps  
816 with Latch- Mediated Springs ? Because They can Jump Higher Without Them. , 1–10.  
817 (doi:10.1093/icb/icz145)
- 818 101. Winter D. 2009 *Biomechanics and motor control of human movement*. 4th edn. Hoboken, NH: John  
819 Wiley & Sons, Inc.
- 820 102. Gollapudi SK, Lin DC. 2009 Experimental determination of sarcomere force-length  
821 relationship in type-I human skeletal muscle fibers. *J. Biomech.* **42**, 2011–2016.  
822 (doi:10.1016/j.jbiomech.2009.06.013)

823

## 824 **Appendix A**

### 825 **Estimation of tendon slack length from experimental measures**

826 Tendon slack length was estimated from experimental measures of muscle and tendon morphology  
827 as follows. First, the maximum isometric force along the tendon was calculated from the maximum  
828 force along the fiber and the pennation angle at optimal fascicle length,  $\theta_{OFL}$ , according to the  
829 equation:

$$F_{maxT} = F_{max} \cos \theta_{OFL}. \quad (5)$$

830 The passive force of the muscle exerted on the tendon in the experimentally measured posture was  
831 found from the normalized passive muscle force as a function of normalized fiber length curve,

832  $f_{np}(nFL)$  [101,102]. This was first scaled, for each muscle, by the maximum isometric force along  
833 the tendon,  $F_{maxT}$ ,

$$f_{muscP} = F_{maxT}f_{np}(nFL). \quad (6)$$

834 By normalizing the experimentally measured average fiber length by the muscle's optimal fascicle  
835 length, we could calculate the normalized fiber length of the muscle in the fixed posture,  $nFL$ ,  
836 allowing us to solve equation (4) for the passive force,  $f_{muscP}$ , each muscle exerted on the tendon in  
837 the experimental posture. Since the three heads of the gastrocnemius attach to the Achilles tendon,  
838 the passive force of each muscle was calculated separately and summed. As the gastrocnemius  
839 intermedia head makes up  $\sim 10\%$  of the total gastrocnemius muscle by volume, the passive  
840 contribution of this muscle was not experimentally determined for each bird but was estimated from  
841 values previously collected [58]. The passive force exerted by the muscle must be balanced by an  
842 equal tendon force, thus, the summed passive muscle forces equal the passive force the tendon  
843 experienced in the experimental posture.

844 The MTU lengths,  $L_{MTU}$ , were measured on the fixed limbs by digitizing the three-dimensional  
845 paths of the MG and LG from their origins on the tibiotarsus and femur, respectively, to the  
846 insertion of the Achilles tendon on the hypotarsus. This approach inherently includes the  
847 aponeurosis in the overall tendon length. Digitizing was done using a digitizing arm (Microscribe  
848 3DX, Immersion, San Jose, CA). The MTU path was described by 11 points. The linear distances  
849 along the MTU path were summed to obtain an overall MTU length. This experimentally measured  
850 MTU length,  $L_{MTU}$ , is the sum of the measured fiber length,  $L_M$ , the tendon's slack length,  $L_T$ , and  
851 length change in the tendon (tendon stretch) due to passive muscle fiber force. The length change

852 in the tendon due to passive muscle fiber force can be described as the tendon strain,  $\epsilon_T$ , times its  
853 tendon slack length,  $L_{T0}$ .

$$L_{MTU} = L_M + L_T + L_T \epsilon_T \quad (7)$$

854 The strain in the tendon due to the passive muscle fiber force,  $\epsilon_T$ , was calculated using the  
855 experimentally measured tendon force-displacement curve. The tendon force-displacement curve  
856 was normalized by tendon length to generate a force-strain curve.

$$f_T = g(\epsilon_T). \quad (8)$$

857 The strain at which the tendon force is equal to the passive fiber force can then be found from the  
858 inverse of equation (6) and the passive muscle force,  $f_{MP}$ .

$$\epsilon_T = g^{-1}(f_{MP}). \quad (9)$$

859 The tendon slack length, for each muscle, then, can be calculated from equations (5) and (7).

$$L_{T0} = \frac{L_{MTU} - L_M}{(1 + \epsilon_T)} \quad (10)$$

860

## 861 **Appendix B**

### 862 **Development of subject specific models**

863 To perform system level analyses, we modified the generic OpenSim guinea fowl model [58] to  
864 generate subject-specific models for each individual. First, the generic model was scaled to match  
865 the measured bone lengths and body mass for each bird and saved as distinct models. In each

866 subject specific model, the generic LG and MG maximum isometric force, pennation angle, optimal  
867 fascicle length and tendon slack length were modified to match the experimentally measured and  
868 calculated properties.

869 The moment arms of the LG and MG acting at the ankle was fit to experimental values by adjusting  
870 the of the size and orientation of the cylindrical wrapping surface for the Achilles at the ankle.

871 During the trial-and-error fitting process, the radius, translation, and rotation of the wrap surface  
872 was modified, and the resulting moment arm was compared to the experimentally collected data at  
873 31-34 points across the experimental range with a mean moment arm normalized root mean square  
874 of the error (Figure S1A) of  $0.009 \pm 0.007$ .

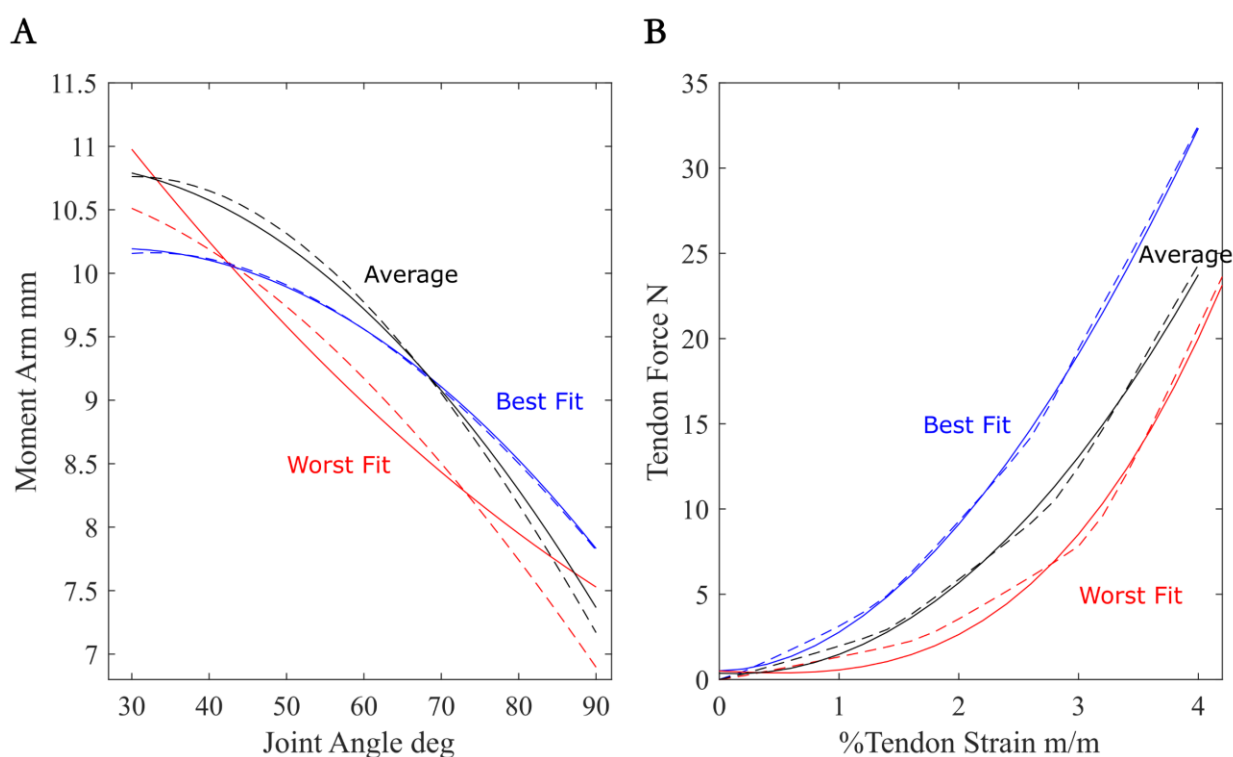

Figure S1: Example comparisons between experimental (solid lines) and modeled (dashed lines) moment arms (A) and tendon force-strain curves (B). In each plot, experimental and modeled curves are displayed for three animals, showing the best, the average and the worst fit across individuals.

875 Additionally, the tendon force-strain curve was updated to match experimentally collected force-  
876 strain values. Because OpenSim scales the tendon force-strain curve by the maximum isometric  
877 force of the muscle, each tendon force-strain curve was normalized by the maximum isometric force  
878 capacity of the LG or MG, respectively. The parameters of the Millard muscle model's tendon force-  
879 strain curve were iteratively varied for both the LG and MG and compared to the experimental  
880 curve for each individual, resulting in an average root mean square error (normalized by tendon  
881 force) over 26-31 points for each tendon force-length curve (Figure S1B) of  $0.061 \pm 0.025$ .
